# Supplementary material for: Intra- and Inter-Host Assessment of Bartonella Diversity with Focus on Non-Hematophagous Bats and Associated Ectoparasites from Brazil
Source: PubMed Central journal article supplement (PMC7699196; doi:10.3390/microorganisms8111822), 2020-11-19
Supplement: microorganisms-08-01822-s001.pdf [file microorganisms-08-01822-s001.pdf]

**Table S1.** Identification of non-hematophagous bat species and associated ectoparasites sampled in Campo Grande city, state of Mato Grosso do Sul, Brazil.

| <b>Animal</b> | <b>Bat species</b>           | <b>Locality</b> | <b>Ectoparasites</b>                                             |
|---------------|------------------------------|-----------------|------------------------------------------------------------------|
| MCG 1         | <i>Artibeus lituratus</i>    | CEA Polonês     | <i>Periglischrus iheringi</i>                                    |
| MCG 2         | <i>Artibeus lituratus</i>    | CEA Polonês     | <i>Paratrichobius longicrus</i><br><i>Periglischrus iheringi</i> |
| MCG 3         | <i>Artibeus planirostris</i> | CEA Polonês     | w/o                                                              |
| MCG 4         | <i>Myotis nigricans</i>      | CEA Polonês     | <i>Steatonyssus</i> spp.                                         |
| MCG 5         | <i>Platyrrhinus lineatus</i> | CEA Polonês     | <i>Periglischrus iheringi</i><br><i>Steatonyssus</i> spp.        |
| MCG 6         | <i>Artibeus planirostris</i> | CEA Polonês     | w/o                                                              |
| MCG 7         | <i>Artibeus planirostris</i> | CEA Polonês     | (2) <i>Megistopoda aranea</i>                                    |
| MCG 8         | <i>Artibeus lituratus</i>    | CEA Polonês     | <i>Megistopoda aranea</i><br><i>Periglischrus iheringi</i>       |
| MCG 9         | <i>Glossophaga soricina</i>  | CEA Polonês     | <i>Trichobius parasiticus</i> (complex)                          |
| MCG 10        | <i>Artibeus lituratus</i>    | CEA Polonês     | <i>Megistopoda aranea</i>                                        |
| MCG 11        | <i>Artibeus planirostris</i> | CEA Polonês     | <i>Megistopoda aranea</i><br><i>Periglischrus iheringi</i>       |
| MCG 12        | <i>Artibeus planirostris</i> | CEA Polonês     | <i>Megistopoda aranea</i>                                        |
| MCG 13        | <i>Artibeus planirostris</i> | CEA Polonês     | w/o                                                              |
| MCG 14        | <i>Artibeus planirostris</i> | CEA Polonês     | <i>Periglischrus iheringi</i>                                    |
| MCG 15        | <i>Platyrrhinus lineatus</i> | CEA Polonês     | w/o                                                              |
| MCG 16        | <i>Artibeus planirostris</i> | CEA Polonês     | <i>Megistopoda aranea</i>                                        |
| MCG 17        | <i>Artibeus planirostris</i> | CEA Polonês     | <i>Megistopoda aranea</i>                                        |
| MCG 18        | <i>Platyrrhinus lineatus</i> | CEA Polonês     | <i>Periglischrus iheringi</i>                                    |
| MCG 19        | <i>Artibeus planirostris</i> | CEA Polonês     | (2) <i>Megistopoda aranea</i>                                    |
| MCG 20        | <i>Platyrrhinus lineatus</i> | CEA Polonês     | <i>Trichobius dugesii</i> (complex)                              |
| MCG 21        | <i>Platyrrhinus lineatus</i> | CEA Polonês     | <i>Periglischrus iheringi</i>                                    |
| MCG 22        | <i>Platyrrhinus lineatus</i> | CEA Polonês     | w/o                                                              |
| MCG 23        | <i>Eptesicus furinalis</i>   | CEA Polonês     | <i>Trichobius dugesii</i> (complex)<br><i>Steatonyssus</i> spp.  |
| MCG 24        | <i>Platyrrhinus lineatus</i> | CEA Polonês     | w/o                                                              |
| MCG 25        | <i>Platyrrhinus lineatus</i> | CEA Polonês     | <i>Trichobius dugesii</i> (complex)                              |

|        |                               |                 |                                         |
|--------|-------------------------------|-----------------|-----------------------------------------|
|        |                               |                 | <i>Periglischrus iheringi</i>           |
| MCG 26 | <i>Artibeus planirostris</i>  | CEA Polonês     | <i>Periglischrus iheringi</i>           |
| MCG 27 | <i>Artibeus planirostris</i>  | CEA Polonês     | <i>Megistopoda aranea</i>               |
|        |                               |                 | <i>Periglischrus iheringi</i>           |
| MCG 28 | <i>Artibeus lituratus</i>     | CEA Polonês     | <i>Periglischrus iheringi</i>           |
| MCG 29 | <i>Artibeus planirostris</i>  | CEA Polonês     | w/o                                     |
| MCG 30 | <i>Platyrrhinus lineatus</i>  | CEA Polonês     | <i>Trichobius dugesii (complex)</i>     |
| MCG 31 | <i>Artibeus lituratus</i>     | CEA Polonês     | w/o                                     |
| MCG 32 | <i>Platyrrhinus lineatus</i>  | CEA Polonês     | <i>Periglischrus iheringi</i>           |
| MCG 33 | <i>Artibeus planirostris</i>  | CEA Polonês     | <i>Periglischrus iheringi</i>           |
| MCG 34 | <i>Platyrrhinus lineatus</i>  | CEA Polonês     | <i>Trichobius parasiticus (complex)</i> |
|        |                               |                 | <i>Periglischrus iheringi</i>           |
| MCG 35 | <i>Artibeus planirostris</i>  | CEA Polonês     | <i>Periglischrus iheringi</i>           |
| MCG 36 | <i>Artibeus planirostris</i>  | CEA Florestinha | w/o                                     |
| MCG 37 | <i>Carollia perspicillata</i> | CEA Florestinha | <i>Trichobius joblingi</i>              |
| MCG 38 | <i>Artibeus planirostris</i>  | CEA Florestinha | <i>Megistopoda aranea</i>               |
| MCG 39 | <i>Artibeus planirostris</i>  | CEA Florestinha | <i>Megistopoda aranea</i>               |
| MCG 40 | <i>Artibeus planirostris</i>  | CEA Florestinha | <i>Megistopoda aranea</i>               |
| MCG 41 | <i>Platyrrhinus lineatus</i>  | CEA Florestinha | <i>Periglischrus iheringi</i>           |
| MCG 42 | <i>Carollia perspicillata</i> | CEA Florestinha | (2) <i>Trichobius dugesii (complex)</i> |
| MCG 43 | <i>Artibeus planirostris</i>  | CEA Florestinha | <i>Megistopoda aranea</i>               |
| MCG 44 | <i>Artibeus planirostris</i>  | CEA Polonês     | <i>Megistopoda aranea</i>               |
| MCG 45 | <i>Myotis nigricans</i>       | CEA Polonês     | w/o                                     |
| MCG 46 | <i>Artibeus lituratus</i>     | CEA Polonês     | w/o                                     |
| MCG 47 | <i>Platyrrhinus lineatus</i>  | CEA Polonês     | w/o                                     |
| MCG 48 | <i>Artibeus planirostris</i>  | CEA Polonês     | w/o                                     |
| MCG 49 | <i>Artibeus lituratus</i>     | CEA Polonês     | w/o                                     |
| MCG 50 | <i>Artibeus lituratus</i>     | CEA Polonês     | w/o                                     |
| MCG 51 | <i>Artibeus planirostris</i>  | CEA Polonês     | w/o                                     |
| MCG 52 | <i>Molossus molossus</i>      | CEA Polonês     | w/o                                     |
| MCG 53 | <i>Artibeus lituratus</i>     | CEA Polonês     | w/o                                     |
| MCG 54 | <i>Molossus molossus</i>      | CEA Florestinha | w/o                                     |
| MCG 55 | <i>Phyllostomus discolor</i>  | CEA Florestinha | <i>Trichobius costalimai</i>            |

|        |                               |                 |                                   |
|--------|-------------------------------|-----------------|-----------------------------------|
| MCG 56 | <i>Phyllostomus discolor</i>  | CEA Florestinha | <i>Strebla hertigi</i>            |
|        |                               |                 | (4) <i>Trichobius costalimai</i>  |
|        |                               |                 | <i>Periglischrus torrealbai</i>   |
|        |                               |                 | <i>Periglischrus acutisternus</i> |
|        |                               |                 | <i>Steatonyssus</i> spp.          |
| MCG 57 | <i>Phyllostomus discolor</i>  | CEA Florestinha | (6) <i>Ornithodoros hasei</i>     |
|        |                               |                 | (5) <i>Trichobius costalimai</i>  |
| MCG 58 | <i>Artibeus lituratus</i>     | CEA Florestinha | <i>Periglischrus torrealbai</i>   |
|        |                               |                 | (2) <i>Ornithodoros hasei</i>     |
| MCG 59 | <i>Phyllostomus discolor</i>  | CEA Florestinha | <i>Periglischrus iheringi</i>     |
|        |                               |                 | <i>Trichobius costalimai</i>      |
| MCG 60 | <i>Molossops temminckii</i>   | CEA Florestinha | <i>Periglischrus</i> spp.         |
|        |                               |                 | w/o                               |
| MCG 61 | <i>Phyllostomus discolor</i>  | CEA Florestinha | <i>Periglischrus torrealbai</i>   |
|        |                               |                 | <i>Ornithodoros hasei</i>         |
| MCG 62 | <i>Phyllostomus discolor</i>  | CEA Florestinha | <i>Trichobius costalimai</i>      |
|        |                               |                 | (2) <i>Periglischrus</i> spp.     |
|        |                               |                 | (2) <i>Ornithodoros hasei</i>     |
| MCG 63 | <i>Phyllostomus discolor</i>  | CEA Florestinha | (2) <i>Trichobius costalimai</i>  |
|        |                               |                 | (7) <i>Ornithodoros hasei</i>     |
|        |                               |                 | <i>Steatonyssus</i> spp.          |
| MCG 64 | <i>Phyllostomus discolor</i>  | CEA Florestinha | (3) <i>Trichobius costalimai</i>  |
|        |                               |                 | <i>Steatonyssus</i> spp.          |
| MCG 65 | <i>Phyllostomus discolor</i>  | CEA Florestinha | (4) <i>Trichobius costalimai</i>  |
|        |                               |                 | <i>Periglischrus acutisternus</i> |
| MCG 66 | <i>Phyllostomus discolor</i>  | CEA Florestinha | (2) <i>Trichobius costalimai</i>  |
|        |                               |                 | <i>Periglischrus acutisternus</i> |
| MCG 67 | <i>Phyllostomus discolor</i>  | CEA Florestinha | <i>Periglischrus torrealbai</i>   |
|        |                               |                 | (3) <i>Trichobius costalimai</i>  |
| MCG 68 | <i>Phyllostomus discolor</i>  | CEA Florestinha | <i>P. torrealbai</i>              |
|        |                               |                 | <i>P. torrealbai</i>              |
| MCG 69 | <i>Carollia perspicillata</i> | CEA Florestinha | <i>Trichobius joblingi</i>        |
| MCG 70 | <i>Phyllostomus discolor</i>  | CEA Florestinha | (2) <i>Strebla hertigi</i>        |
|        |                               |                 | (3) <i>Periglischrus</i> spp.     |

|        |                              |                 |                                                                                                |
|--------|------------------------------|-----------------|------------------------------------------------------------------------------------------------|
| MCG 71 | <i>Phyllostomus discolor</i> | CEA Florestinha | <i>Periglischrus</i> spp.<br><i>Steatonyssus</i> spp.<br><i>Trichobius costalimai</i>          |
| MCG 72 | <i>Phyllostomus discolor</i> | CEA Florestinha | <i>Trichobius costalimai</i><br><i>Periglischrus acutisternus</i><br><i>Ornithodoros hasei</i> |
| MCG 73 | <i>Molossus molossus</i>     | CEA Florestinha | <i>w/o</i>                                                                                     |
| MCG 74 | <i>Eptesicus furinalis</i>   | CEA Polonês     | <i>Steatonyssus</i> spp.                                                                       |
| MCG 75 | <i>Eptesicus furinalis</i>   | CEA Polonês     | <i>Steatonyssus</i> spp.                                                                       |
| MCG 76 | <i>Artibeus lituratus</i>    | CEA Polonês     | <i>w/o</i>                                                                                     |
| MCG 77 | <i>Platyrrhinus lineatus</i> | CEA Polonês     | <i>w/o</i>                                                                                     |
| MCG 78 | <i>Artibeus lituratus</i>    | CEA Polonês     | <i>Periglischrus iheringi</i>                                                                  |
| MCG 79 | <i>Platyrrhinus lineatus</i> | CEA Polonês     | <i>Trichobius dugesii (complex)</i>                                                            |
| MCG 80 | <i>Platyrrhinus lineatus</i> | CEA Polonês     | <i>w/o</i>                                                                                     |
| MCG 81 | <i>Platyrrhinus lineatus</i> | CEA Polonês     | <i>w/o</i>                                                                                     |
| MCG 82 | <i>Eptesicus furinalis</i>   | CEA Polonês     | <i>Steatonyssus</i> spp.<br><i>Trichobius dugesii (complex)</i>                                |
| MCG 83 | <i>Platyrrhinus lineatus</i> | CEA Polonês     | <i>Periglischrus iheringi</i>                                                                  |
| MCG 84 | <i>Artibeus lituratus</i>    | CEA Polonês     | <i>Periglischrus iheringi</i>                                                                  |
| MCG 85 | <i>Artibeus lituratus</i>    | CEA Polonês     | <i>w/o</i>                                                                                     |
| MCG 86 | <i>Platyrrhinus lineatus</i> | CEA Polonês     | <i>w/o</i>                                                                                     |
| MCG 87 | <i>Artibeus lituratus</i>    | CEA Polonês     | <i>Periglischrus iheringi</i>                                                                  |
| MCG 88 | <i>Platyrrhinus lineatus</i> | CEA Polonês     | <i>w/o</i>                                                                                     |
| MCG 89 | <i>Platyrrhinus lineatus</i> | CEA Polonês     | <i>Trichobius dugesii (complex)</i><br><i>Periglischrus iheringi</i>                           |
| MCG 90 | <i>Artibeus lituratus</i>    | CEA Polonês     | <i>Steatonyssus</i> spp.                                                                       |
| MCG 91 | <i>Eumops perotis</i>        | CEA Florestinha | <i>Steatonyssus</i> spp.                                                                       |
| MCG 92 | <i>Eumops perotis</i>        | CEA Florestinha | <i>Steatonyssus</i> spp.                                                                       |
| MCG 93 | <i>Eumops perotis</i>        | CEA Florestinha | <i>Steatonyssus</i> spp.                                                                       |
| MCG 94 | <i>Molossus molossus</i>     | CEA Florestinha | <i>Steatonyssus</i> spp.                                                                       |
| MCG 95 | <i>Eumops perotis</i>        | CEA Florestinha | <i>Steatonyssus</i> spp.                                                                       |
| MCG 96 | <i>Artibeus lituratus</i>    | CEA Polonês     | <i>w/o</i>                                                                                     |
| MCG 97 | <i>Artibeus lituratus</i>    | CEA Polonês     | <i>Periglischrus iheringi</i>                                                                  |

|         |                               |                 |                                     |
|---------|-------------------------------|-----------------|-------------------------------------|
| MCG 98  | <i>Artibeus lituratus</i>     | CEA Polonês     | <i>w/o</i>                          |
| MCG 99  | <i>Chiroderma villosum</i>    | CEA Polonês     | <i>w/o</i>                          |
| MCG 100 | <i>Artibeus lituratus</i>     | CEA Polonês     | <i>w/o</i>                          |
| MCG 101 | <i>Platyrrhinus lineatus</i>  | CEA Polonês     | <i>w/o</i>                          |
| MCG 102 | <i>Artibeus lituratus</i>     | CEA Polonês     | <i>Periglischrus iheringi</i>       |
| MCG 103 | <i>Artibeus planirostris</i>  | CEA Polonês     | <i>w/o</i>                          |
| MCG 104 | <i>Artibeus lituratus</i>     | CEA Polonês     | <i>Periglischrus iheringi</i>       |
| MCG 105 | <i>Artibeus lituratus</i>     | CEA Polonês     | <i>w/o</i>                          |
| MCG 106 | <i>Eptesicus furinalis</i>    | CEA Polonês     | <i>Steatonyssus spp.</i>            |
| MCG 107 | <i>Artibeus planirostris</i>  | CEA Polonês     | <i>w/o</i>                          |
| MCG 108 | <i>Artibeus planirostris</i>  | CEA Polonês     | <i>w/o</i>                          |
| MCG 109 | <i>Artibeus planirostris</i>  | CEA Polonês     | <i>w/o</i>                          |
| MCG 110 | <i>Artibeus planirostris</i>  | CEA Polonês     | <i>w/o</i>                          |
| MCG 111 | <i>Carollia perspicillata</i> | CEA Polonês     | <i>w/o</i>                          |
| MCG 112 | <i>Artibeus planirostris</i>  | CEA Polonês     | <i>w/o</i>                          |
| MCG 113 | <i>Artibeus planirostris</i>  | CEA Polonês     | <i>w/o</i>                          |
| MCG 114 | <i>Platyrrhinus lineatus</i>  | CEA Polonês     | <i>w/o</i>                          |
| MCG 115 | <i>Artibeus planirostris</i>  | CEA Florestinha | <i>w/o</i>                          |
| MCG 116 | <i>Artibeus lituratus</i>     | CEA Florestinha | <i>w/o</i>                          |
| MCG 117 | <i>Artibeus lituratus</i>     | CEA Florestinha | <i>w/o</i>                          |
| MCG 118 | <i>Artibeus lituratus</i>     | CEA Florestinha | <i>w/o</i>                          |
| MCG 119 | <i>Artibeus lituratus</i>     | CEA Florestinha | <i>w/o</i>                          |
| MCG 120 | <i>Artibeus planirostris</i>  | CEA Florestinha | <i>Megistopoda aranea</i>           |
| MCG 121 | <i>Artibeus lituratus</i>     | CEA Florestinha | <i>w/o</i>                          |
| MCG 122 | <i>Artibeus planirostris</i>  | CEA Polonês     | <i>Steatonyssus spp.</i>            |
| MCG 123 | <i>Eptesicus furinalis</i>    | CEA Polonês     | <i>Steatonyssus spp.</i>            |
| MCG 124 | <i>Eptesicus furinalis</i>    | CEA Polonês     | <i>Periglischrus spp.</i>           |
| MCG 125 | <i>Artibeus lituratus</i>     | CEA Polonês     | <i>w/o</i>                          |
| MCG 126 | <i>Artibeus lituratus</i>     | CEA Polonês     | <i>Trichobius dugesii (complex)</i> |
| MCG 127 | <i>Carollia perspicillata</i> | CEA Polonês     | <i>w/o</i>                          |
| MCG 128 | <i>Artibeus lituratus</i>     | CEA Florestinha | <i>Periglischrus iheringi</i>       |
| MCG 129 | <i>Artibeus lituratus</i>     | CEA Florestinha | <i>w/o</i>                          |
| MCG 130 | <i>Artibeus lituratus</i>     | CEA Florestinha | <i>w/o</i>                          |

|         |                            |                 |                               |
|---------|----------------------------|-----------------|-------------------------------|
| MCG 131 | <i>Eptesicus furinalis</i> | CEA Polonês     | <i>Steatonyssus</i> spp.      |
| MCG 132 | <i>Eptesicus furinalis</i> | CEA Polonês     | <i>Steatonyssus</i> spp.      |
| MCG 133 | <i>Artibeus lituratus</i>  | CEA Florestinha | <i>Periglischrus iheringi</i> |
| MCG 134 | <i>Artibeus lituratus</i>  | CEA Florestinha | <i>Periglischrus iheringi</i> |
| MCG 135 | <i>Artibeus lituratus</i>  | CEA Florestinha | w/o                           |

w/o: ectoparasites were not found on bats at sampling.

**Table S2.** Results of quantification and positivity of bat blood and ectoparasite samples tested for *Bartonella* spp. by qPCR (*nuoG* gene) and conventional (c) PCR assays for the *gltA*, *rpoB*, *ftsZ* and *nuoG* genes. The sequenced samples are highlighted in dark yellow.

| Local           | Species                           | Ectoparasite Host             | Sample        | qPCR quantification<br>( <i>nuoG</i> copies/ $\mu$ L) | cPCR<br><i>gltA</i> | cPCR<br><i>rpoB</i> | cPCR<br><i>ftsZ</i> | cPCR<br><i>nuoG</i> |
|-----------------|-----------------------------------|-------------------------------|---------------|-------------------------------------------------------|---------------------|---------------------|---------------------|---------------------|
| CEA Polonês     | <i>Platyrrhinus lineatus</i>      |                               | Blood #05     | $5.19 \times 10^0 \pm 5.00 \times 10^{-1}$            | +                   | +                   | -                   | +NS                 |
| CEA Polonês     | <i>Platyrrhinus lineatus</i>      |                               | Blood #15     | $3.02 \times 10^0 \pm 7.78 \times 10^{-1}$            | +                   | -                   | -                   | +NS                 |
| CEA Polonês     | <i>Artibeus planirostris</i>      |                               | Blood #16     | $1.86 \times 10^0 \pm 2.40 \times 10^{-1}$            | +NS                 | + F                 | + F                 | +                   |
| CEA Polonês     | <i>Platyrrhinus lineatus</i>      |                               | Blood #18     | $4.73 \times 10^1 \pm 1.08 \times 10^0$               | +                   | + F                 | + F                 | +NS                 |
| CEA Polonês     | <i>Platyrrhinus lineatus</i>      |                               | Blood #20     | $1.20 \times 10^0 \pm 1.55 \times 10^{-1}$            | +                   | -                   | -                   | +NS                 |
| CEA Polonês     | <i>Trichobius dugesii</i> complex | <i>Eptesicus furinalis</i>    | Batfly #23    | $3.36 \times 10^1 \pm 6.28 \times 10^0$               | -                   | + F                 | + F                 | +                   |
| CEA Polonês     | <i>Platyrrhinus lineatus</i>      |                               | Blood #24     | $1.80 \times 10^1 \pm 4.13 \times 10^0$               | +                   | +                   | -                   | +NS                 |
| CEA Polonês     | <i>Platyrrhinus lineatus</i>      |                               | Blood #25     | $9.57 \times 10^1 \pm 1.78 \times 10^1$               | +                   | +                   | + F                 | +NS                 |
| CEA Polonês     | <i>Trichobius dugesii</i> complex | <i>Platyrrhinus lineatus</i>  | Batfly #30    | $3.28 \times 10^2 \pm 6.49 \times 10^0$               | +                   | + F                 | -                   | +NS                 |
| CEA Polonês     | <i>Platyrrhinus lineatus</i>      |                               | Blood #32     | $1.40 \times 10^0 \pm 1.59 \times 10^{-1}$            | +                   | -                   | -                   | +NS                 |
| CEA Polonês     | <i>Platyrrhinus lineatus</i>      |                               | Blood #34     | $1.20 \times 10^0 \pm 6.35 \times 10^{-2}$            | + F                 | -                   | -                   | +                   |
| CEA Florestinha | <i>Carollia perspicillata</i>     |                               | Blood #42     | $2.91 \times 10^3 \pm 1.77 \times 10^2$               | +                   | -                   | +                   | +NS                 |
| CEA Florestinha | <i>Trichobius dugesii</i> complex | <i>Carollia perspicillata</i> | Batfly #42 M1 | $1.87 \times 10^0 \pm 2.98 \times 10^{-1}$            | -                   | -                   | -                   | +                   |
| CEA Florestinha | <i>Trichobius dugesii</i> complex | <i>Carollia perspicillata</i> | Batfly #42 M2 | $1.04 \times 10^0 \pm 2.36 \times 10^{-1}$            | -                   | -                   | -                   | +                   |
| CEA Polonês     | <i>Artibeus planirostris</i>      |                               | Blood #44     | $1.09 \times 10^1 \pm 9.88 \times 10^{-1}$            | + F                 | + F                 | + F                 | +                   |
| CEA Polonês     | <i>Artibeus planirostris</i>      |                               | Blood #51     | $8.14 \times 10^{-1} \pm 2.60 \times 10^{-2}$         | +NS                 | -                   | + F                 | +NS                 |

|                 |                                   |                                |               |                                               |     |     |     |     |
|-----------------|-----------------------------------|--------------------------------|---------------|-----------------------------------------------|-----|-----|-----|-----|
| CEA Florestinha | <i>Trichobius costalimai</i>      | <i>Phyllostomus discolor</i>   | Batfly #55    | $9.84 \times 10^{-1} \pm 2.03 \times 10^{-1}$ | -   | -   | -   | +   |
| CEA Florestinha | <i>Trichobius costalimai</i>      | <i>Phyllostomus discolor</i>   | Batfly #57 M  | $1.69 \times 10^{-1} \pm 4.53 \times 10^{-2}$ | + F | -   | + F | +   |
| CEA Florestinha | <i>Trichobius costalimai</i>      | <i>Phyllostomus discolor</i>   | Batfly #59    | $1.94 \times 10^0 \pm 2.39 \times 10^{-1}$    | + F | -   | + F | +   |
| CEA Florestinha | <i>Trichobius costalimai</i>      | <i>Phyllostomus discolor</i>   | Batfly #65 F1 | $1.77 \times 10^0 \pm 2.85 \times 10^{-1}$    | -   | -   | -   | +   |
| CEA Polonês     | <i>Steatonyssus spp.</i>          | <i>Eptesicus furinalis</i>     | Bat mite #74  | $1.07 \times 10^0 \pm 2.31 \times 10^{-1}$    | -   | -   | + F | -   |
| CEA Polonês     | <i>Steatonyssus spp.</i>          | <i>Eptesicus furinalis</i>     | Bat mite #75  | $3.51 \times 10^{-1} \pm 7.8 \times 10^{-2}$  | -   | -   | + F | -   |
| CEA Polonês     | <i>Platyrrhinus lineatus</i>      |                                | Blood #77     | $2.95 \times 10^0 \pm 3.98 \times 10^{-1}$    | +   | -   | +   | +NS |
| CEA Polonês     | <i>Platyrrhinus lineatus</i>      |                                | Blood #79     | $3.65 \times 10^{-1} \pm 8.27 \times 10^{-3}$ | +   | -   | -   | +NS |
| CEA Polonês     | <i>Trichobius dugesii complex</i> | <i>Platyrrhinus lineatus</i>   | Batfly #79    | $1.29 \times 10^3 \pm 2.24 \times 10^2$       | +   | +   | -   | +NS |
| CEA Polonês     | <i>Platyrrhinus lineatus</i>      |                                | Blood #81     | $1.97 \times 10^0 \pm 3.03 \times 10^{-1}$    | +   | +   | -   | +NS |
| CEA Polonês     | <i>Steatonyssus spp.</i>          | <i>Eptesicus furinalis</i>     | Bat mite #82  | $9.75 \times 10^{-2} \pm 3.51 \times 10^{-3}$ | -   | -   | + F | -   |
| CEA Polonês     | <i>Trichobius dugesii complex</i> | <i>Platyrrhinus lineatus</i>   | Batfly #83    | $6.38 \times 10^2 \pm 2.40 \times 10^1$       | +   | +   | + F | +NS |
| CEA Polonês     | <i>Platyrrhinus lineatus</i>      |                                | Blood #114    | $9.38 \times 10^1 \pm 1.58 \times 10^{-1}$    | +   | + F | + F | +NS |
| CEA Florestinha | <i>Megistopoda aranea</i>         | <i>Artibeus planirostris</i>   | Batfly #120   | $9.20 \times 10^{-1} \pm 2.23 \times 10^{-1}$ | -   | -   | +   | +   |
| CEA Polonês     | <i>Artibeus lituratus</i>         |                                | Blood #125    | $6.43 \times 10^0 \pm 1.36 \times 10^0$       | +   | -   | -   | +NS |
| CEA Polonês     | <i>Artibeus lituratus</i>         |                                | Blood #126    | $6.34 \times 10^0 \pm 1.37 \times 10^0$       | +   | +   | -   | +NS |
| CEA Polonês     | <i>Steatonyssus spp.</i>          | <i>Eptesicus cf. furinalis</i> | Bat mite #132 | $4.27 \times 10^0 \pm 8.38 \times 10^{-1}$    | -   | -   | + F | -   |

+ = positive and sequenced; +NS = positive but not sequenced; +F = positive with a faint band in electrophoresis agarose-gel; - = negative.

**Table S3.** Results of nBLAST analysis with correspondent GenBank accession number for each sequenced clone obtained from bat blood and fly samples with the correspondent genotype for each sample.

| Animal | Local           | Specie                            | Sample     | Clone 1                                       | Clone 2                                       | Clone 3                                       | Query Coverage | Identity | Genotypes    |
|--------|-----------------|-----------------------------------|------------|-----------------------------------------------|-----------------------------------------------|-----------------------------------------------|----------------|----------|--------------|
| MCG 05 | CEA Polonês     | <i>Platyrrhinus lineatus</i>      | Blood      | <i>Bartonella</i> spp.<br>(MH234319.1)        | <i>Bartonella</i> spp.<br>(MH234380.1)        | <i>Bartonella</i> spp.<br>(MH234380.1)        | 98-100%        | 93-95%   | 1 and 3      |
| MCG 15 | CEA Polonês     | <i>Platyrrhinus lineatus</i>      | Blood      | <i>Bartonella</i> spp.<br>(KJ816676.1)        | <i>Bartonella</i> spp.<br>(KJ816676.1)        | <i>Bartonella</i> spp.<br>(KJ816676.1)        | 95-99%         | 92%      | 4            |
| MCG 18 | CEA Polonês     | <i>Platyrrhinus lineatus</i>      | Blood      | <i>Bartonella</i> spp.<br>(KJ816687.1)        | <i>Bartonella</i> spp.<br>(MH234380.1)        | <i>Bartonella</i> spp.<br>(MH234380.1)        | 95-97%         | 95%      | 2            |
| MCG 20 | CEA Polonês     | <i>Platyrrhinus lineatus</i>      | Blood      | <i>Bartonella</i> spp.<br>(MH234347.1)        | <i>Bartonella</i> spp.<br>(KJ816676.1)        | <i>Bartonella</i> spp.<br>(KJ816676.1)        | 96-98%         | 92-96%   | 1 and 5      |
| MCG 24 | CEA Polonês     | <i>Platyrrhinus lineatus</i>      | Blood      | <i>Bartonella</i> spp.<br>(KJ816676.1)        | <i>Bartonella</i> spp.<br>(KJ816676.1)        | <i>Bartonella</i> spp.<br>(MH234333.1)        | 89-97%         | 92-99%   | 6 and 7      |
| MCG 25 | CEA Polonês     | <i>Platyrrhinus lineatus</i>      | Blood      | <i>Bartonella</i> spp.<br>(KJ816676.1)        | <i>Bartonella</i> spp.<br>(KJ816676.1)        | <i>Bartonella</i> spp.<br>(KJ816676.1)        | 94-98%         | 92%      | 8            |
| MCG 30 | CEA Polonês     | <i>Trichobius dugesii complex</i> | Bat fly 30 | <i>Bartonella</i><br>vinsonii<br>(LR134529.1) | <i>Bartonella</i><br>vinsonii<br>(LR134529.1) | <i>Bartonella</i><br>vinsonii<br>(LR134529.1) | 100%           | 88%      | 1 and 2      |
| MCG 32 | CEA Polonês     | <i>Platyrrhinus lineatus</i>      | Blood      | <i>Bartonella</i> spp.<br>(MH234319.1)        | <i>Bartonella</i> spp.<br>(KJ816676.1)        | <i>Bartonella</i> spp.<br>(MH234380.1)        | 98-99%         | 92-95%   | 1, 3 and 6   |
| MCG 42 | CEA Florestinha | <i>Carollia perspicillata</i>     | Blood      | <i>Bartonella</i> spp.<br>(MH234346.1)        | <i>Bartonella</i> spp.<br>(MH234346.1)        | <i>Bartonella</i> spp.<br>(MH234346.1)        | 90-91%         | 99-100%  | 9            |
| MCG 77 | CEA Polonês     | <i>Platyrrhinus lineatus</i>      | Blood      | <i>Bartonella</i> spp.<br>(MH234319.1)        | <i>Bartonella</i> spp.<br>(KJ816682.1)        | <i>Bartonella</i> spp.<br>(KJ816682.1)        | 99-100%        | 93%      | 3 and 6      |
| MCG 79 | CEA Polonês     | <i>Platyrrhinus lineatus</i>      | Blood      | <i>Bartonella</i> spp.<br>(KJ816676.1)        | <i>Bartonella</i> spp.<br>(KJ816676.1)        | <i>Bartonella</i> spp.<br>(KJ816676.1)        | 95-97%         | 92-93%   | 3            |
|        |                 | <i>Trichobius dugesii complex</i> | Bat fly 79 | <i>Bartonella</i> spp.<br>(MH234380.1)        | <i>Bartonella</i> spp.<br>(MH234380.1)        | <i>Bartonella</i> spp.<br>(MH234380.1)        | 95-97%         | 95%      | 1            |
| MCG 81 | CEA Polonês     | <i>Platyrrhinus lineatus</i>      | Blood      | <i>Bartonella</i> spp.<br>(KJ816673.1)        | <i>Bartonella</i> spp.<br>(KJ816676.1)        | <i>Bartonella</i> spp.<br>(MH234322.1)        | 90-96%         | 91-96%   | 6, 10 and 11 |
| MCG 83 | CEA Polonês     | <i>Trichobius dugesii complex</i> | Bat fly 83 | <i>Bartonella</i> spp.<br>(MH234380.1)        | <i>Bartonella</i> spp.<br>(MH234380.1)        | <i>Bartonella</i> spp.<br>(MH234380.1)        | 96-98%         | 95%      | 1            |



|         |             |                              |       |                                        |                                        |                                        |        |        |             |
|---------|-------------|------------------------------|-------|----------------------------------------|----------------------------------------|----------------------------------------|--------|--------|-------------|
| MCG 114 | CEA Polonês | <i>Platyrrhinus lineatus</i> | Blood | <i>Bartonella</i> spp.<br>(MH234380.1) | <i>Bartonella</i> spp.<br>(MH234380.1) | <i>Bartonella</i> spp.<br>(MH234380.1) | 95-97% | 92-96% | 2 and 12    |
| MCG 125 | CEA Polonês | <i>Artibeus lituratus</i>    | Blood | <i>Bartonella</i> spp.<br>(KJ816682.1) | <i>Bartonella</i> spp.<br>(KJ816676.1) | <i>Bartonella</i> spp.<br>(KJ816676.1) | 97-99% | 92%    | 3           |
| MCG 126 | CEA Polonês | <i>Artibeus lituratus</i>    | Blood | <i>Bartonella</i> spp.<br>(KJ816676.1) | <i>Bartonella</i> spp.<br>(KJ816682.1) | <i>Bartonella</i> spp.<br>(KJ816682.1) | 97-99% | 92%    | 6, 8 and 13 |
